# Supplementary material for: Effect of Ni/Co mass ratio and NiO–Co3O4 loading on catalytic performance of NiO–Co3O4/Nb2O5–TiO2 for direct synthesis of 2-propylheptanol from n-valeraldehyde
Source: Royal Society of Chemistry journal article supplement (doi:10.1039/d0ra08903f), 2021-01-01
Supplement: d0ra08903f1.pdf [file d0ra08903f1.pdf]

## Electronic Supplementary Information (ESI)

### Effect of Ni/Co mass ratio and NiO-Co<sub>3</sub>O<sub>4</sub> loading on catalytic performance of NiO-Co<sub>3</sub>O<sub>4</sub>/Nb<sub>2</sub>O<sub>5</sub>-TiO<sub>2</sub> for direct synthesis of 2-propylheptanol from *n*-valeraldehyde

Lili Zhao,<sup>ab</sup> Hualiang An,<sup>\*a</sup> Xinqiang Zhao<sup>\*a</sup> and Yanji Wang<sup>a</sup>

<sup>a</sup>Hebei Provincial Key Lab of Green Chemical Technology and Efficient Energy Saving, School of Chemical Engineering and Technology, Hebei University of Technology, Tianjin 300130, China

<sup>b</sup>College of Science and Technology, Hebei Agricultural University, Huanghua, Hebei 061100, China

\* Corresponding author: Xinqiang Zhao, Hualiang An

Postal address:

School of Chemical Engineering and Technology, Hebei University of Technology, No. 8 Guangrong Road,

Hongqiao District, Tianjin, 300130, China

E-mail address: zhaoxq@hebut.edu.cn, anhl@hebut.edu.cn

Fax: +86-22-60204294

## S1. XPS spectra of NiO-Co<sub>3</sub>O<sub>4</sub>/Nb<sub>2</sub>O<sub>5</sub>-TiO<sub>2</sub> with different Ni/Co mass ratios before and after reaction

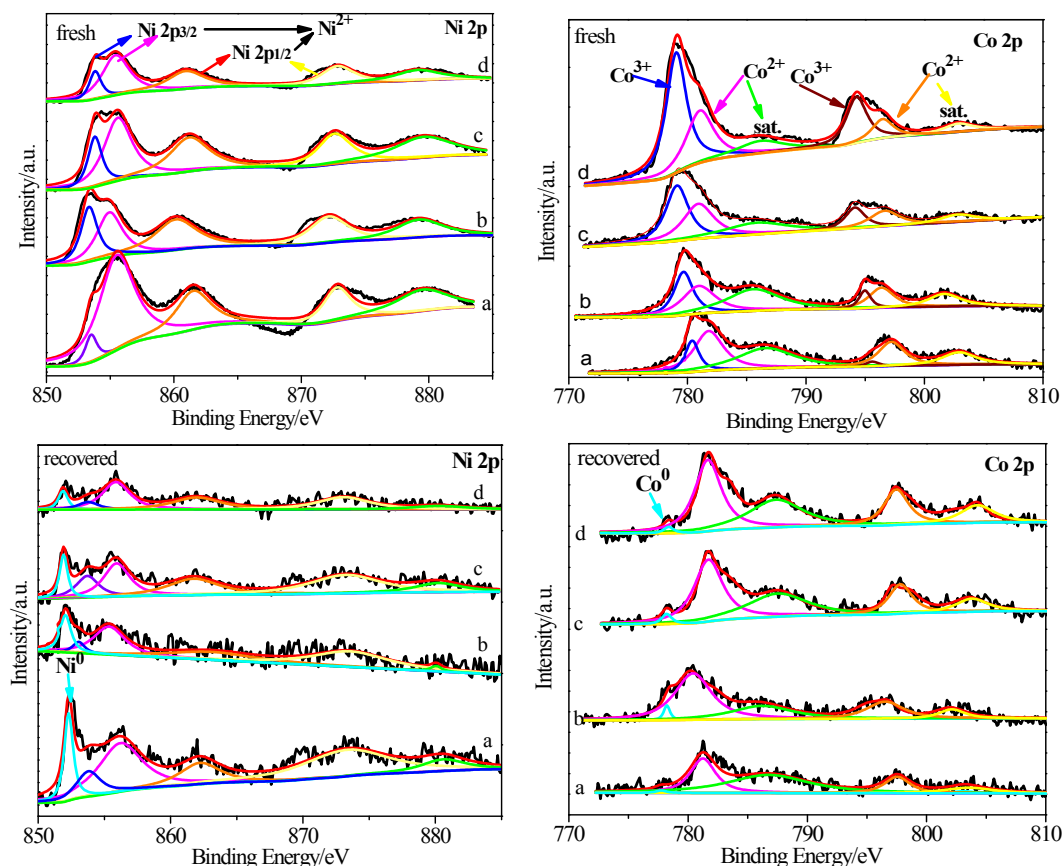

**Fig. S1** Ni 2p and Co 2p XPS spectra of NiO-Co<sub>3</sub>O<sub>4</sub>/Nb<sub>2</sub>O<sub>5</sub>-TiO<sub>2</sub> with different Ni/Co mass ratios before and after reaction. a: Ni/Co=10; b: Ni/Co=8/3; c: Ni/Co=6/5; d: Ni/Co=4/7.

## S2. Catalytic performance of NiO-Co<sub>3</sub>O<sub>4</sub>/Nb<sub>2</sub>O<sub>5</sub>-TiO<sub>2</sub>

The NiO-Co<sub>3</sub>O<sub>4</sub>/Nb<sub>2</sub>O<sub>5</sub>-TiO<sub>2</sub> catalyst with a Ni/Co mass ratio of 8/3 and a NiO-Co<sub>3</sub>O<sub>4</sub> loading of 14 wt.% was used to study the effect of reaction conditions.

The effect of catalyst amount was investigated and the result is listed in Table S1. With an increase of catalyst amount, *n*-valeraldehyde could be converted completely until the catalyst weight percentage reached 20 %. The selectivity of 2-PH increased firstly, reached its highest value at a catalyst weight percentage of 15 %, decreased and finally dropped to zero at a catalyst weight percentage of 20 %. The selectivity of *n*-pentanol decreased firstly, reached its lowest value at a catalyst weight percentage of 15 %, and then increased. When the catalyst weight

percentage was 10 %, the selectivity of *n*-pentanol, 2-propylheptanal and 2-PH was almost 1/3 due to less active sites. 2-PH was not formed and 2-propyl-2-heptenal and 2-propylheptanal were the main products at catalyst amount of 20 %, possibly owing to incomplete reduction of NiO.

**Table S1** Effect of catalyst amount on direct synthesis of 2-PH from *n*-valeraldehyde

| Catalyst amount/% | $X_V$ /% | $S_{PO}$ /% | $S_{2-PHEA}$ /% | $S_{2-PHA}$ /% | $S_{2-PH}$ /% |
|-------------------|----------|-------------|-----------------|----------------|---------------|
| 10                | 100      | 30.7        | 0               | 34.9           | 31.9          |
| 12.5              | 100      | 28.1        | 0               | 0              | 69.6          |
| 15                | 100      | 18.2        | 0               | 0              | 81.4          |
| 17.5              | 100      | 25.1        | 0               | 0              | 73.0          |
| 20                | 92.5     | 10.6        | 30.6            | 50.4           | 0             |

Reaction conditions:  $T=200$  °C,  $P=3$  MPa,  $t=6$  h.

V: *n*-valeraldehyde; PO: *n*-pentanol; 2-PHEA: 2-propyl-2-heptenal; 2-PHA: 2-propylheptanal;

2-PH: 2-propylheptanol.  $X$ : conversion;  $S$ : selectivity.

The effect of reaction pressure on direct synthesis of 2-PH from *n*-valeraldehyde was investigated and the result was listed in Table S2. *n*-Valeraldehyde was not completely reduced and 2-PH was not formed at a reaction pressure of 2 MPa. The main products were 2-propylheptanal and 2-propyl-2-heptenal instead. When reaction pressure was higher than 3 MPa, *n*-valeraldehyde was reduced completely while the selectivity of 2-PH reached its optimum at reaction pressure of 3 MPa and then decreased. The selectivity of *n*-pentanol increased significantly with a decrease of 2-PH selectivity at a reaction pressure of 4 MPa.

**Table S2** Effect of reaction pressure on direct synthesis of 2-PH from *n*-valeraldehyde

| Reaction pressure/MPa | $X_V$ /% | $S_{PO}$ /% | $S_{2-PHEA}$ /% | $S_{2-PHA}$ /% | $S_{2-PH}$ /% |
|-----------------------|----------|-------------|-----------------|----------------|---------------|
| 2                     | 94.7     | 8.2         | 32.8            | 52.8           | 0             |
| 3                     | 100      | 18.2        | 0               | 0              | 81.4          |
| 4                     | 100      | 33.1        | 0               | 0              | 59.4          |

Reaction conditions: a weight percentage of catalyst =15 %,  $T=200$  °C,  $t=6$  h.

V: *n*-valeraldehyde; PO: *n*-pentanol; 2-PHEA: 2-propyl-2-heptenal; 2-PHA: 2-propylheptanal;

2-PH: 2-propylheptanol.  $X$ : conversion;  $S$ : selectivity.

The effect of reaction temperature on direct synthesis of 2-PH from *n*-valeraldehyde was investigated. As can be seen from Table S3, conversion of *n*-valeraldehyde was 100 % at a reaction temperature ranging from 180 °C to 210 °C. With an increase of reaction temperature,

selectivity of 2-PH increased first and then decreased while that of *n*-pentanol changed just the opposite. *n*-Valeraldehyde self-condensation is controlled by kinetics at a lower reaction temperature and the increase of reaction temperature is conducive to increasing the reaction rate. However, the reaction is controlled by thermodynamics at a higher reaction temperature and the increase of reaction temperature is not conducive to the reaction.<sup>S1</sup> In addition, total selectivity of both *n*-pentanol and 2-PH decreased at reaction temperature of 210 °C, possibly due to esterification of *n*-pentanol or 2-PH with by-product *n*-pentanoic acid which was confirmed by gas chromatography-mass spectrometry (GC-MS) analysis results. This indicated that a higher reaction temperature promoted the occurrence of side-reactions such as esterification. Selectivity of 2-PH was the highest (81.4 %) and that of *n*-pentanol was the lowest (18.2 %) at a reaction temperature of 200 °C.

**Table S3** Effect of reaction temperature on direct synthesis of 2-PH from *n*-valeraldehyde

| Reaction temperature/°C | $X_V$ /% | $S_{PO}$ /% | $S_{2-PHA}$ /% | $S_{2-PH}$ /% |
|-------------------------|----------|-------------|----------------|---------------|
| 180                     | 100      | 28.0        | 27.3           | 43.6          |
| 190                     | 100      | 27.6        | 0              | 71.1          |
| 200                     | 100      | 18.2        | 0              | 81.4          |
| 210                     | 100      | 25.0        | 0              | 66.1          |

Reaction conditions: a weight percentage of catalyst =15 %,  $P=3$  MPa,  $t=6$  h.

V: *n*-valeraldehyde; PO: *n*-pentanol; 2-PHA: 2-propylheptanal; 2-PH: 2-propylheptanol.

$X$ : conversion;  $S$ : selectivity.

The effect of reaction time on direct synthesis of 2-PH from *n*-valeraldehyde was investigated and the results are shown in Table S4. 2-Propylheptanal was formed at a reaction time less than 5 h, indicating that C=O bond of 2-propylheptanal was not completely hydrogenated. The main product was 2-PH at reaction time of 5 h, indicating that the product was completely hydrogenated. However, selectivity of *n*-pentanol decreased slightly while selectivity of 2-PH remained basically unchanged at reaction time of 7 h, possibly due to the reaction of *n*-pentanol

with by-product *n*-pentanoic acid to amyl valerate.

**Table S4** Effect of reaction time on direct synthesis of 2-PH from *n*-valeraldehyde

| Reaction time/h | $X_V$ /% | $S_{PO}$ /% | $S_{2-PHA}$ /% | $S_{2-PH}$ /% |
|-----------------|----------|-------------|----------------|---------------|
| 4               | 100      | 19.1        | 15.2           | 65.1          |
| 5               | 100      | 19.0        | 0              | 80.4          |
| 6               | 100      | 18.2        | 0              | 81.4          |
| 7               | 100      | 15.0        | 0              | 79.2          |

Reaction conditions: a weight percentage of catalyst =15 %,  $P=3$  MPa,  $T=200$  °C.

V: *n*-valeraldehyde; PO: *n*-pentanol; 2-PHA: 2-propylheptanal; 2-PH: 2-propylheptanol.

$X$ : conversion;  $S$ : selectivity.

## Reference

S1 L. Zhao, H. An, X. Zhao and Y. Wang, *Ind. Eng. Chem. Res.*, 2016, **55**, 12326-12333.
